# Supplementary material for: Remarkable acid strength of ammonium ions in zeolites: FTIR study of low-temperature CO adsorption on NH4FER
Source: Royal Society of Chemistry journal article supplement (doi:10.1039/c4ra12504e), 2014-01-01
Supplement: c4ra12504e1.pdf [file c4ra12504e1.pdf]

Remarkable acid strength of ammonium ions in zeolites:  
FTIR study of low-temperature CO adsorption on NH<sub>4</sub>FER

Electronic supplementary information

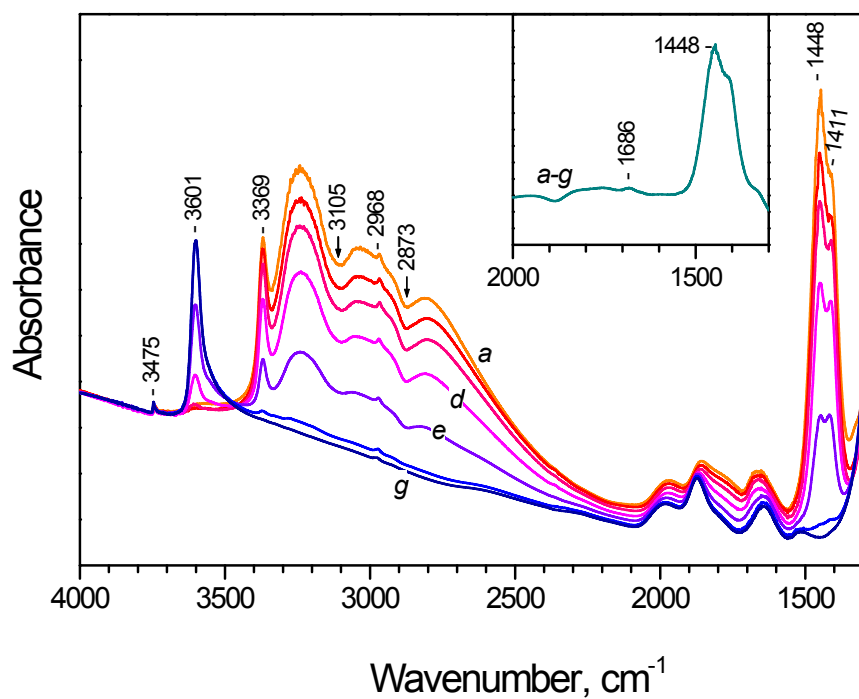

**Figure S1.** FTIR spectra of NH<sub>4</sub>FER evacuated at 373 K (a), 423 K (b), 473 K (c), 523 K (d), 573 K (e), 623 K (f) and 673 K (g). The time of evacuation of 15 min except for spectrum a, 60 min. The inset shows the difference a-g spectrum.

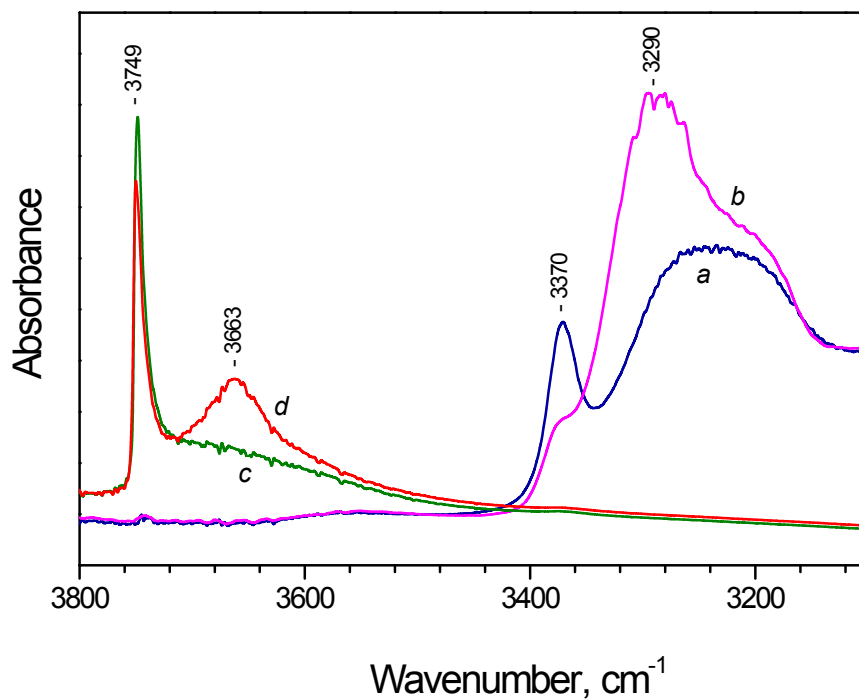

**Figure S2.** FTIR spectra registered at 100 K of:  $\text{NH}_4\text{FER}$  evacuated at 373 K (a) and after contact of the sample with CO (90 Pa equilibrium pressure) (b);  $\text{SiO}_2$  evacuated at 673 K (c) and after contact of the sample with CO (100 Pa equilibrium pressure) (d).
